# Supplementary material for: Serum indoxyl sulfate concentrations associate with progression of chronic kidney disease in children
Source: PubMed Central journal article supplement (PMC7591021; doi:10.1371/journal.pone.0240446), 2020-10-27
Supplement: pone.0240446.s001.pdf [file pone.0240446.s001.pdf]

**S1 Fig. Log-transformed serum levels of indoxyl sulfate (A) and p-cresyl sulfate (B) are correlated with eGFR in 604 children with chronic kidney disease at study entry.**

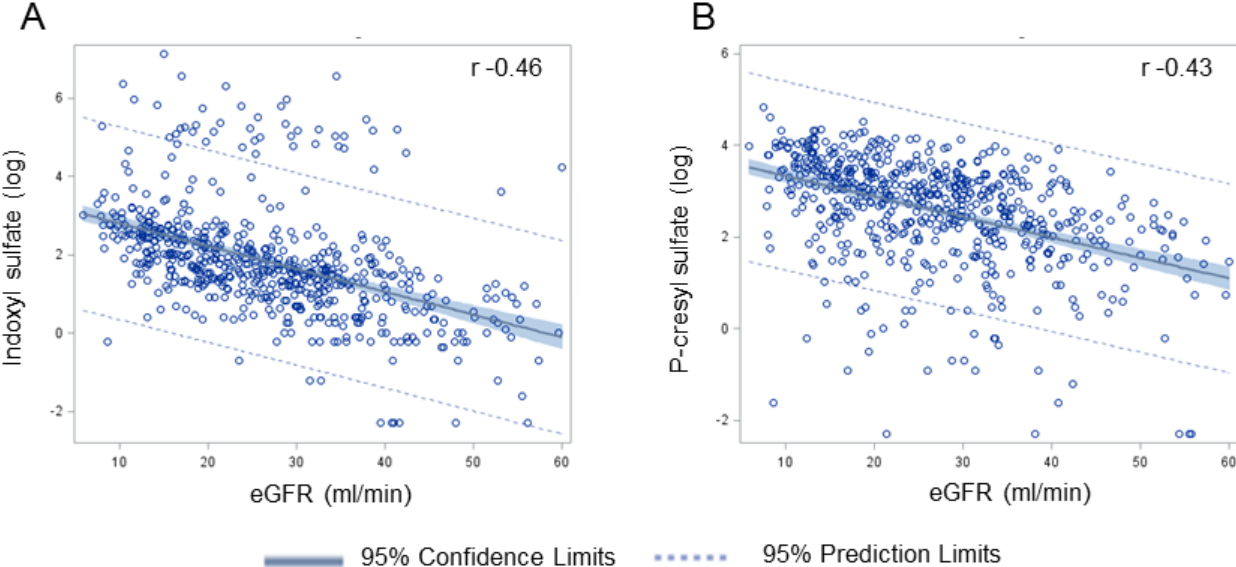

Linear regression of log-transformed serum levels of indoxyl sulfate (IS) and p-cresyl sulfate (pCS) showed a significant correlation with eGFR (Pearson correlation coefficient  $r = -0.46$  for IS and  $r = -0.43$  for pCS). 45 patients had IS levels above the 95% upper prediction limit (UPL). While no patients had pCS levels above the 95% UPL, some patients had pCS levels below the 95% lower prediction limit.
