# Supplementary material for: Serum indoxyl sulfate concentrations associate with progression of chronic kidney disease in children
Source: PubMed Central journal article supplement (PMC7591021; doi:10.1371/journal.pone.0240446), 2020-10-27
Supplement: pone.0240446.s003.pdf [file pone.0240446.s003.pdf]

**S2 Table. Multivariable linear regression models of variables associated with serum levels of indoxyl sulfate and p-cresyl sulfate in 604 children with CKD at baseline**

|                                   | Log indoxyl sulfate |              |                 | Log-p-cresyl sulfate |              |                 |
|-----------------------------------|---------------------|--------------|-----------------|----------------------|--------------|-----------------|
|                                   | Estimate ± SE       |              | P-Value         | Estimate ± SE        |              | P-Value         |
| Age (years)                       | -.017               | ±.016        | .274            | <b>.035</b>          | <b>±.574</b> | <b>.008</b>     |
| Girls                             | -.146               | ±.119        | .192            | -.045                | ±.013        | .629            |
| BMI SDS                           | .013                | ±.040        | .741            | -.036                | ±.032        | .271            |
| <b>Diagnosis</b>                  |                     |              |                 |                      |              |                 |
| Tubulointerstitial                | .165                | ±.157        | .294            | -.018                | ±.129        | .888            |
| Glomerulopathy                    | -.096               | ±.213        | .651            | <b>-.469</b>         | <b>±.176</b> | <b>.008</b>     |
| Post-AKI                          | .261                | ±.266        | .326            | -.285                | ±.219        | .195            |
| Others                            | .237                | ±.261        | .367            | .419                 | ±.216        | .067            |
| <b>Residency</b>                  |                     |              |                 |                      |              |                 |
| Non-Mediterranean                 | -.188               | ±.115        | .102            | <b>.350</b>          | <b>±.095</b> | <b>&lt;.001</b> |
| <b>Physical activity</b>          |                     |              |                 |                      |              |                 |
| 1 – 2 hours                       | -.107               | ±.163        | .510            | -.180                | ±.134        | .180            |
| 2 – 4 hours                       | .037                | ±.179        | .835            | .162                 | ±.150        | .256            |
| > 4 hours                         | -.037               | ±.136        | .786            | <b>-.226</b>         | <b>±.112</b> | <b>.044</b>     |
| eGFR (ml/min/1.73m <sup>2</sup> ) | <b>-.050</b>        | <b>±.008</b> | <b>&lt;.001</b> | <b>-.035</b>         | <b>±.007</b> | <b>&lt;.001</b> |
| Serum albumin (g/l)               | .001                | ±.010        | .902            | <b>.035</b>          | <b>±.008</b> | <b>&lt;.001</b> |
| Urea (mg/dl)                      | <b>.013</b>         | <b>±.004</b> | <b>.004</b>     | <b>.007</b>          | <b>±.004</b> | <b>.038</b>     |
| Uric acid (mg/dl)                 | <b>-.121</b>        | <b>±.032</b> | <b>&lt;.001</b> | <b>-.082</b>         | <b>±.026</b> | <b>.002</b>     |
| Serum phosphorus                  | .207                | ±.150        | .167            | .014                 | ±.123        | .911            |
| Log UPCr                          | .194                | ±.109        | .074            | .021                 | ±.047        | .652            |
| Ca-based P binders                | .001                | ±.100        | .995            | .042                 | ±.090        | .634            |
| Iron Therapy                      | .194                | ±.109        | .074            | <b>.190</b>          | <b>±.090</b> | <b>.034</b>     |
| Antibiotics                       | -.036               | ±.135        | .790            | .034                 | ±.111        | .762            |

Diagnostic groups were compared to patients with the diagnosis of CAKUT. Residency was defined as living in Mediterranean or Non-Mediterranean countries. Physical activity was compared to being physically inactive (0 hours).

SE= standard error; CAKUT= congenital anomalies of the kidney and urinary tract; Post-AKI= chronic kidney disease after acute kidney injury; BMI= body mass index; eGFR= estimated glomerular filtration rate; Ca-based P binders= calcium-based phosphate binders; uPCr= Urinary protein creatinine ratio; SDS= standard deviation score.
