# Supplementary material for: Serum indoxyl sulfate concentrations associate with progression of chronic kidney disease in children
Source: PubMed Central journal article supplement (PMC7591021; doi:10.1371/journal.pone.0240446), 2020-10-27
Supplement: pone.0240446.s006.pdf [file pone.0240446.s006.pdf]

**S5 Table. Antibiotic therapy at baseline and within 6 weeks before baseline stratified by diagnosis group**

|                                      | All          | CAKUT        | Glomerulopathy | Others       | P-value         |
|--------------------------------------|--------------|--------------|----------------|--------------|-----------------|
| Antibiotics at baseline              |              |              |                |              |                 |
| - no                                 | 476 ( 78.8%) | 298 ( 71.0%) | 46 ( 93.9%)    | 132 ( 97.8%) | <b>&lt;.001</b> |
| - yes                                | 128 ( 21.2%) | 122 ( 29.0%) | 3 ( 6.1%)      | 3 ( 2.2%)    |                 |
| Antibiotics <6 weeks before baseline |              |              |                |              |                 |
| - no                                 | 474 ( 78.5%) | 297 ( 70.7%) | 45 ( 91.8%)    | 132 ( 97.8%) | <b>&lt;.001</b> |
| - yes                                | 130 ( 21.5%) | 123 ( 29.3%) | 4 ( 8.2%)      | 3 ( 2.2%)    |                 |

CAKUT= congenital anomalies of the kidney and urinary tract.
